# Supplementary material for: Ru@MnO2 core@shell nanowires as a bifunctional electrocatalyst for efficient solar-driven seawater splitting
Source: Royal Society of Chemistry journal article supplement (doi:10.1039/d4cc06144f), 2025-01-01
Supplement: d4cc06144f1.pdf [file d4cc06144f1.pdf]

Electronic Supplementary Material (ESI) for Chemical Science.  
This journal is © The Royal Society of Chemistry 2022

## Supporting Information to

# **Ru@MnO<sub>2</sub> core@shell nanowires as bifunctional electrocatalyst for efficient solar-driven seawater splitting**

Na Li,<sup>a</sup> Aitong Yang,<sup>a</sup> Mengyuan Jin,<sup>a</sup> Shun Wang,<sup>a</sup> Ping Yu,<sup>b,\*</sup> Juan Wang,<sup>a,\*</sup> and Huile Jin,<sup>a,\*</sup>

<sup>a</sup>Wenzhou Key Lab of Advanced Energy Storage and Conversion, Zhejiang Province Key Lab of Leather Engineering, College of Chemistry and Materials Engineering, Wenzhou University, Wenzhou, Zhejiang 325035, China.

<sup>b</sup>Technological Institute of Materials & Energy Science (TIMES), Xi'an Key Laboratory of Advanced Photo-electronics Materials and Energy Conversion Device, Xijing University, Xi'an, 710123, China.

\* Corresponding author: Juan Wang: [juanwang@wzu.edu.cn](mailto:juanwang@wzu.edu.cn);

Ping Yu: [yupingtina1128@126.com](mailto:yupingtina1128@126.com)

Huile Jin: [huilejin@wzu.edu.cn](mailto:huilejin@wzu.edu.cn)

## Experimental Procedures

### 1. Materials

Sodium chloride (NaCl, AR, 99.5%) and Isopropyl alcohol (C<sub>3</sub>H<sub>8</sub>O, ≥99.5%) were obtained from Shanghai Meryer. Ruthenium (III) chloride hydrate (RuCl<sub>3</sub>·H<sub>2</sub>O, 97%, Ru: 37%, RG) was purchased from Adamas. Manganese Dioxide (MnSO<sub>4</sub>·H<sub>2</sub>O, AR) was bought from Shanghai Dibo Biotechnology Co., LTD. Potassium persulfate (K<sub>2</sub>S<sub>2</sub>O<sub>8</sub>, 99.9%) was purchased from Macklin. Potassium permanganate (KMnO<sub>4</sub>, AR) was acquired from Zhejiang Zhongxing Chemical Reagent Co., LTD.

### 2. Preparation of α-MnO<sub>2</sub> NWs

Typically, 0.13 g of MnSO<sub>4</sub>·H<sub>2</sub>O and 0.33 g of KMnO<sub>4</sub> were dissolved in 20 mL of ultrapure water under magnetic stirring. The mixture was then transferred to a 40 mL Teflon-lined autoclave for heat treatment at 160 °C for 12 h. After cooling to room temperature, the precipitate was centrifuged and washed three times with ultrapure water and alcohol. After drying overnight in an oven at 80 °C, the final product of α-MnO<sub>2</sub> was collected.

### 3. Preparation of β-MnO<sub>2</sub> NWs

Typically, 0.73 g of MnSO<sub>4</sub>·H<sub>2</sub>O and 1.16 g of K<sub>2</sub>S<sub>2</sub>O<sub>8</sub> were dissolved in 20 mL of water and then homogenized by ultrasound. The mixture was then transferred to a 40 mL Teflon-lined autoclave and heated in an oven at 160 °C for 24 h. After cooling, the sediment was centrifuged and washed three times with ultrapure water and alcohol. After drying overnight, the final product of β-MnO<sub>2</sub> was obtained.

### 4. Preparation of Ru@MnO<sub>2</sub> NWs

Typically, 12.50 mg of MnO<sub>2</sub> NWs and 10 mg of RuCl<sub>3</sub>·xH<sub>2</sub>O are separately dispersed in 2.5 mL of water. After ultrasonic treatment for half an hour to create a uniform dispersion, the RuCl<sub>3</sub> solution was added to the MnO<sub>2</sub> NWs solution and further subjected to ultrasonic treatment. The obtained product is then dried in an oven at 80 °C. Subsequently, the dried product was annealed in an Ar atmosphere at 300 °C for 2 h to obtain Ru@MnO<sub>2</sub> NWs.

### 3. Characterization

X-ray diffraction (XRD) patterns was performed on Bruker D8 ADVANCE X-ray diffractometer equipped with Cu Kα radiation source (λ=1.5418 Å). X-ray photoelectron spectroscopy (XPS) was tested using the SSI S-Probe XPS spectrometer. The morphology of the samples was examined by SEM (10 kV, FEI electron microscope). High-resolution TEM (HRTEM) images and energy dispersive X-ray spectrometry (EDS) elemental mapping were carried out at an electron acceleration voltage of 200 kV (FEI Talos F200s).

### 4. Electrochemical measurements

All electrochemical data were collected on CHI760 electrochemical station (Chenhua, Shanghai). As-prepared samples were as working electrodes, a graphite rod as the counter electrodes and a standard Hg/HgO electrode as the reference electrode. The polarization curve was measured using LSV technology at a scan rate of 5 mV s<sup>-1</sup>. All LSV curves in this paper use 95 % iR compensation. A mixture of 1 mg catalyst, 0.5 mg carbon black, 200 μL isopropanol, and 5 μL Nafion was sonicated to form a well-dispersed ink, and the dispersion was then coated on a glass carbon electrode (diameter: 5 mm) for electrochemical testing. The double-layer capacitance (C<sub>dl</sub>) was obtained by cyclic test voltammetry with scan rates ranging from 20 to 100 mV s<sup>-1</sup>.

### 5. Photocatalysis section

The photocatalytic process employed Ru@α-MnO<sub>2</sub> NWs (loaded on carbon paper with a surface area of 1×1 cm<sup>2</sup>) as both cathode and anode catalysts. The system was powered by a polycrystalline silicon photovoltaic solar cell (with an active area of 0.36 cm<sup>2</sup>, a maximum voltage of 2 V, a rated voltage of 2 V, and a short-circuit current of 101 mA) and tested in a two-electrode electrochemical cell.

## Results and Discussion

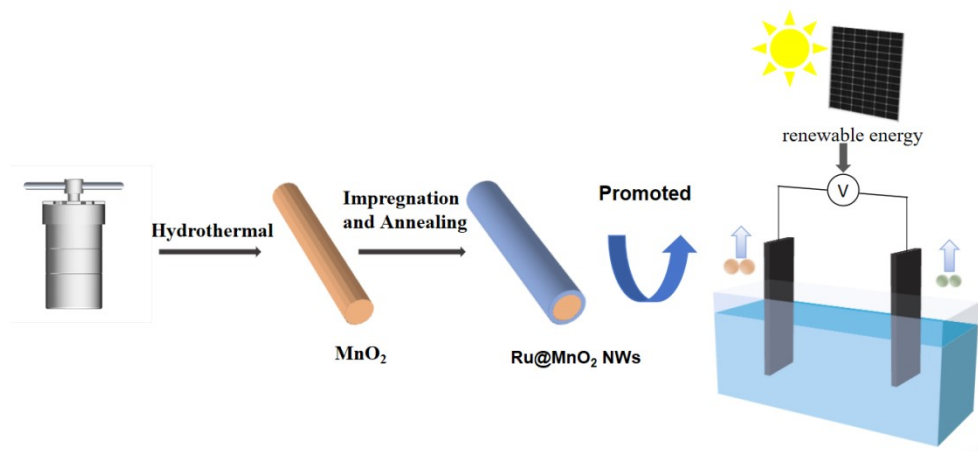

**Fig. S1** Schematic illustration of the synthesis process of Ru@MnO<sub>2</sub> and electrode reactions.

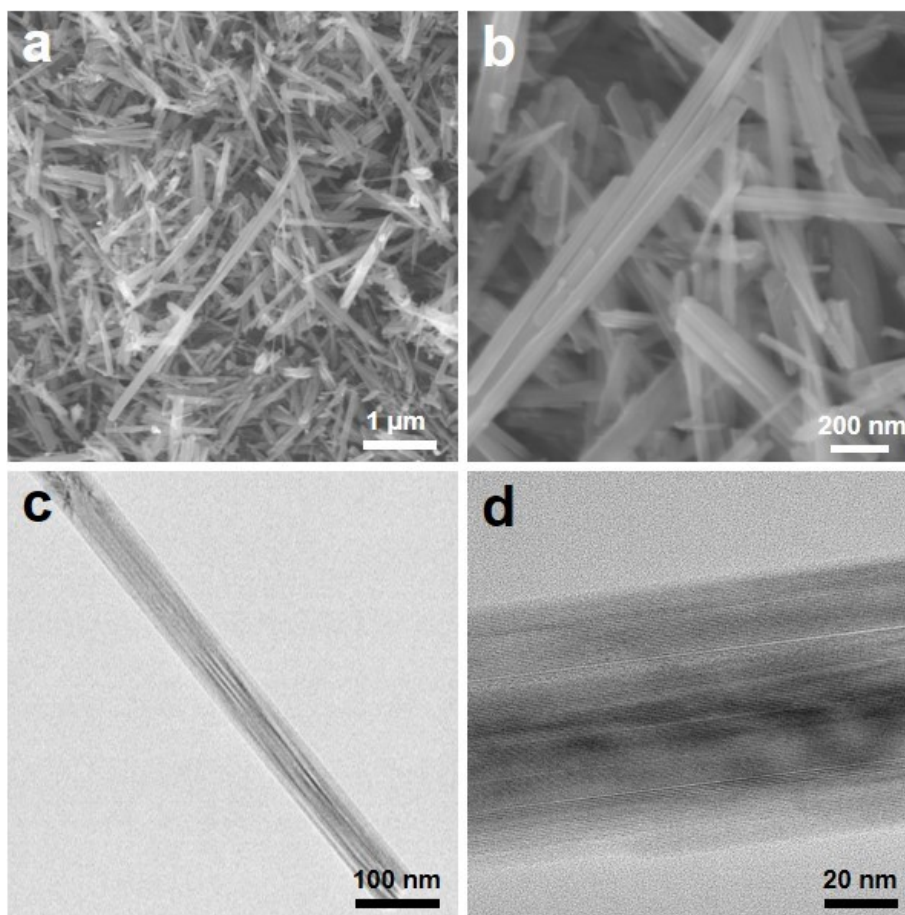

**Fig. S2** (a, b) SEM images and (c, d) TEM images of  $\alpha$ - $\text{MnO}_2$  NWs.

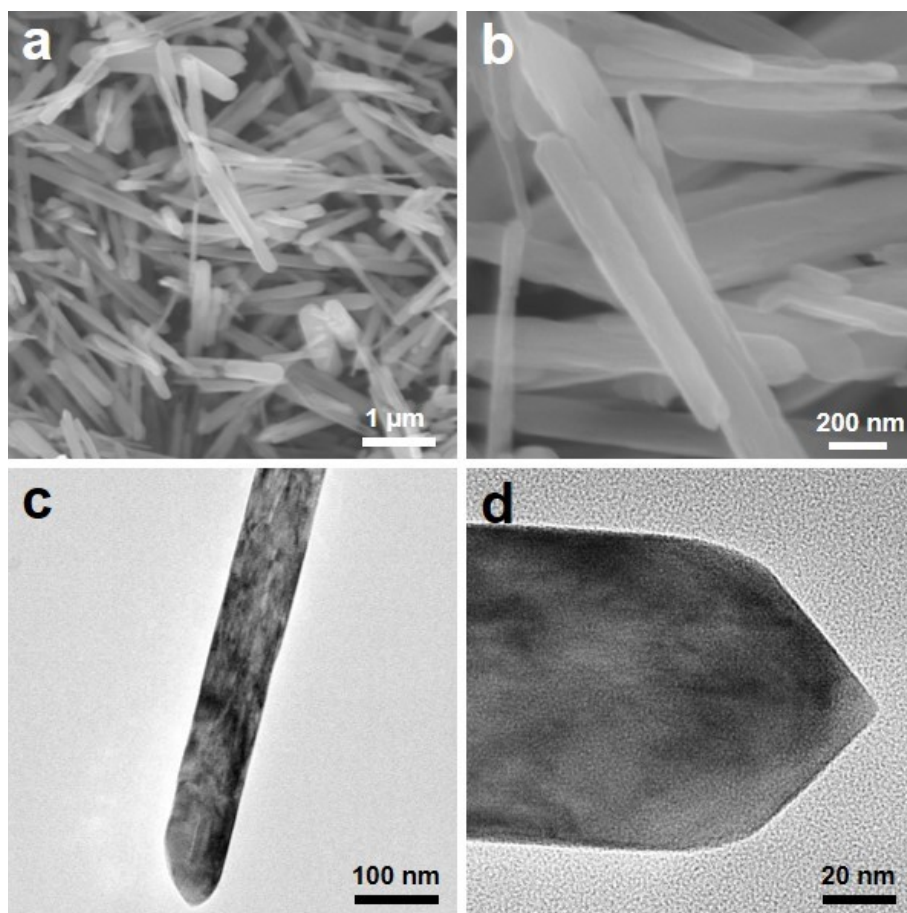

**Fig. S3** (a, b) SEM images and (c, d) TEM images of  $\beta$ - $\text{MnO}_2$  NWs.

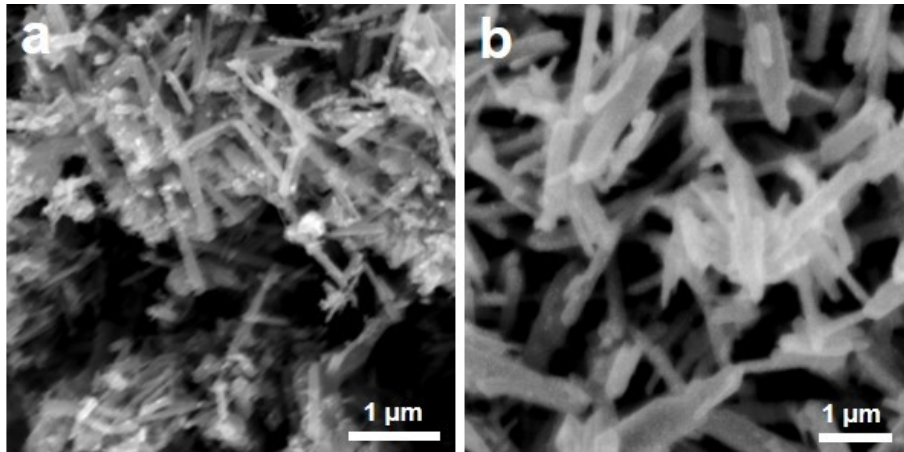

**Fig. S4** SEM images of (a) Ru@ $\alpha$ -MnO<sub>2</sub> NWs and (b) Ru@ $\beta$ -MnO<sub>2</sub> NWs.

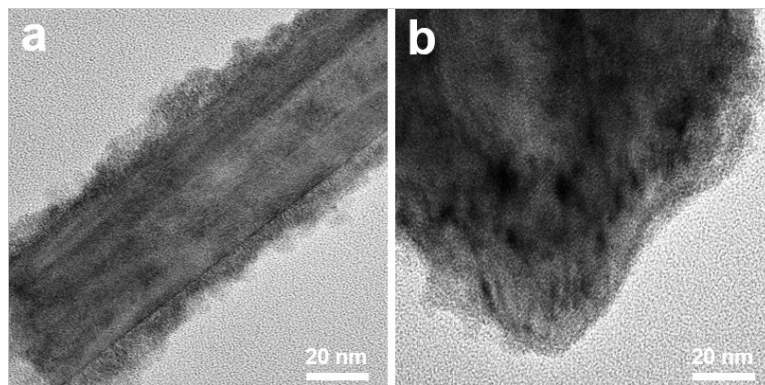

**Fig. S5** TEM images of (a) Ru@ $\alpha$ -MnO<sub>2</sub> NWs and (b) Ru@ $\beta$ -MnO<sub>2</sub> NWs.

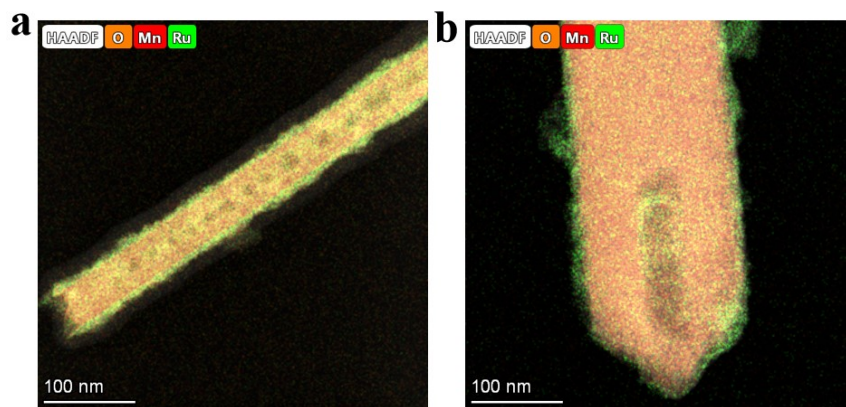

**Fig. S6** HADF images of (a) Ru@ $\alpha$ -MnO<sub>2</sub> NWs and (b) Ru@ $\beta$ -MnO<sub>2</sub> NWs.



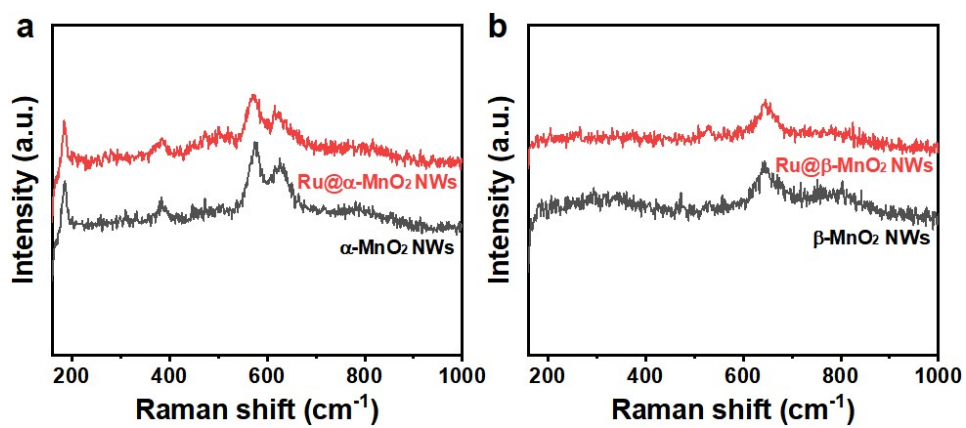

**Fig. S7** Raman spectra of (a)  $\alpha$ -MnO<sub>2</sub> NWs and Ru@ $\alpha$ -MnO<sub>2</sub> NWs and (b)  $\beta$ -MnO<sub>2</sub> NWs and Ru@ $\beta$ -MnO<sub>2</sub> NWs.

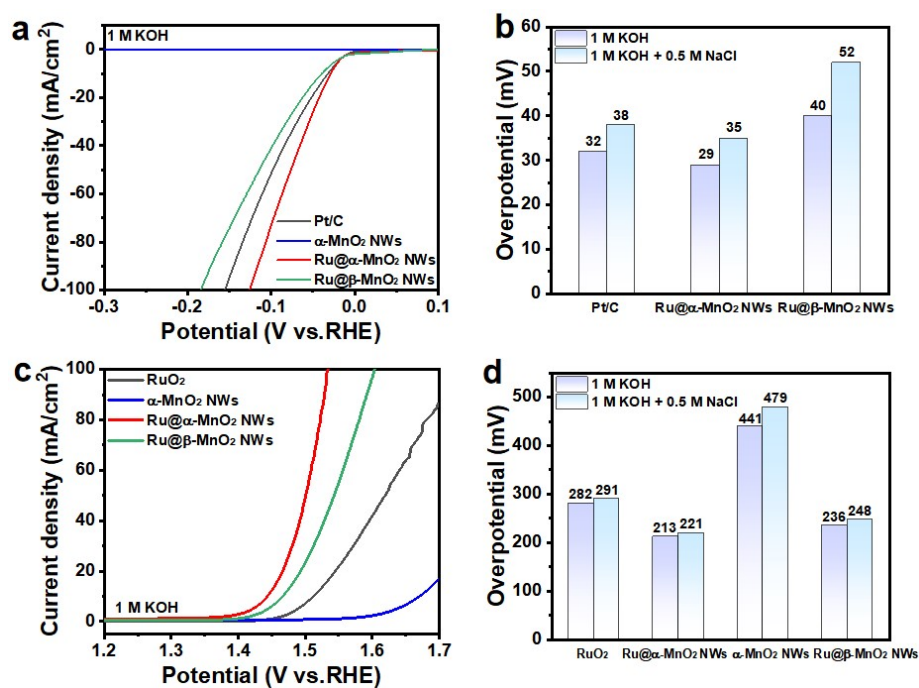

**Fig. S8** (a) HER polarization curves and (b) corresponding overpotential ( $10 \text{ mA cm}^{-2}$ ) in different electrocatalysts. (c) OER polarization curves and (d) corresponding overpotential ( $10 \text{ mA cm}^{-2}$ ) in different electrocatalysts.

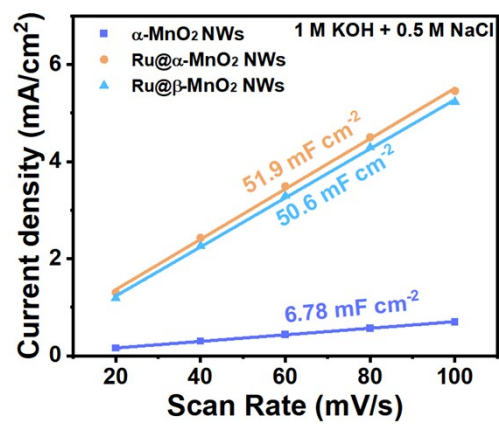

Fig. S9 C<sub>dl</sub> plots of  $\alpha$ -MnO<sub>2</sub> NWs, Ru@ $\alpha$ -MnO<sub>2</sub> NWs, and Ru@ $\beta$ -MnO<sub>2</sub> NWs.

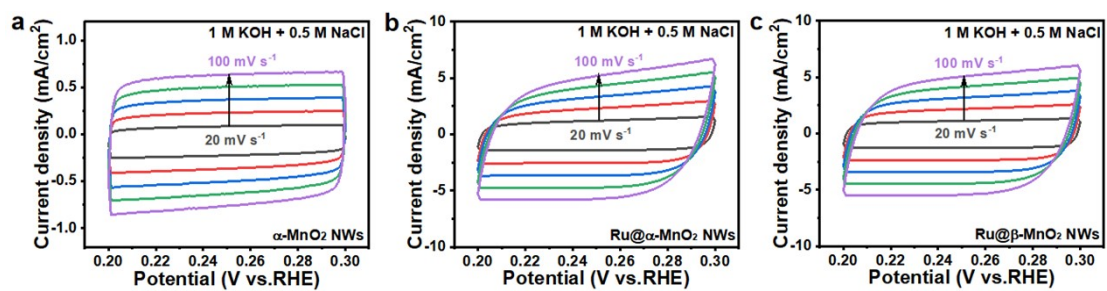

**Fig. S10** CV curves of (a)  $\alpha$ -MnO<sub>2</sub> NWs, (b) Ru@ $\alpha$ -MnO<sub>2</sub> NWs, and (c) Ru@ $\beta$ -MnO<sub>2</sub> NWs in 1 M KOH + 0.5 M NaCl.

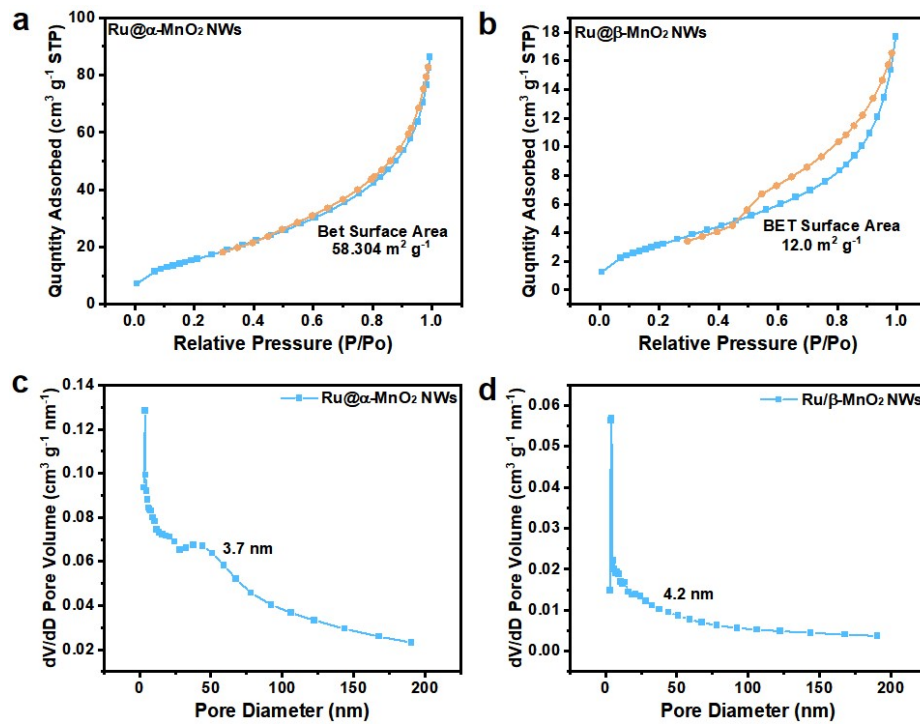

**Fig. S11** (a, b) N<sub>2</sub> adsorption–desorption isotherm and (c, d) pore size distribution of (a, b) Ru@ $\alpha$ -MnO<sub>2</sub> NWs and (c, d) Ru@ $\beta$ -MnO<sub>2</sub> NWs.

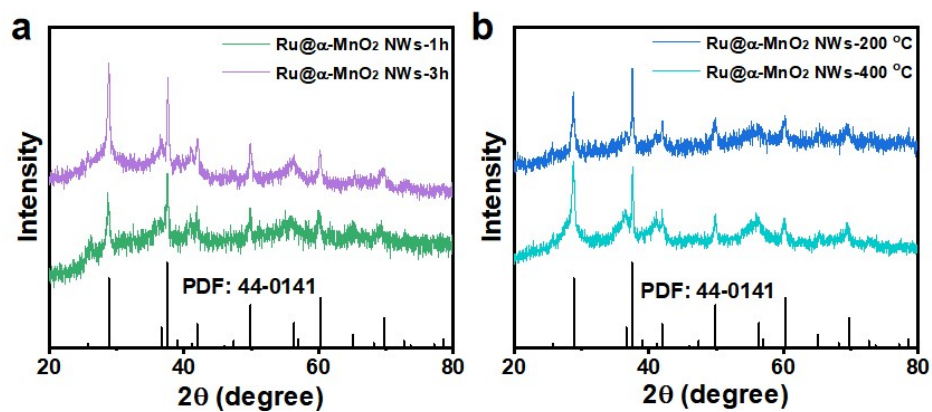

**Fig. S12** XRD patterns of (a) Ru@ $\alpha$ -MnO<sub>2</sub> NWs-1h and Ru@ $\alpha$ -MnO<sub>2</sub> NWs-3h and (b) Ru@ $\alpha$ -MnO<sub>2</sub> NWs-200 °C and Ru@ $\alpha$ -MnO<sub>2</sub> NWs-400 °C.

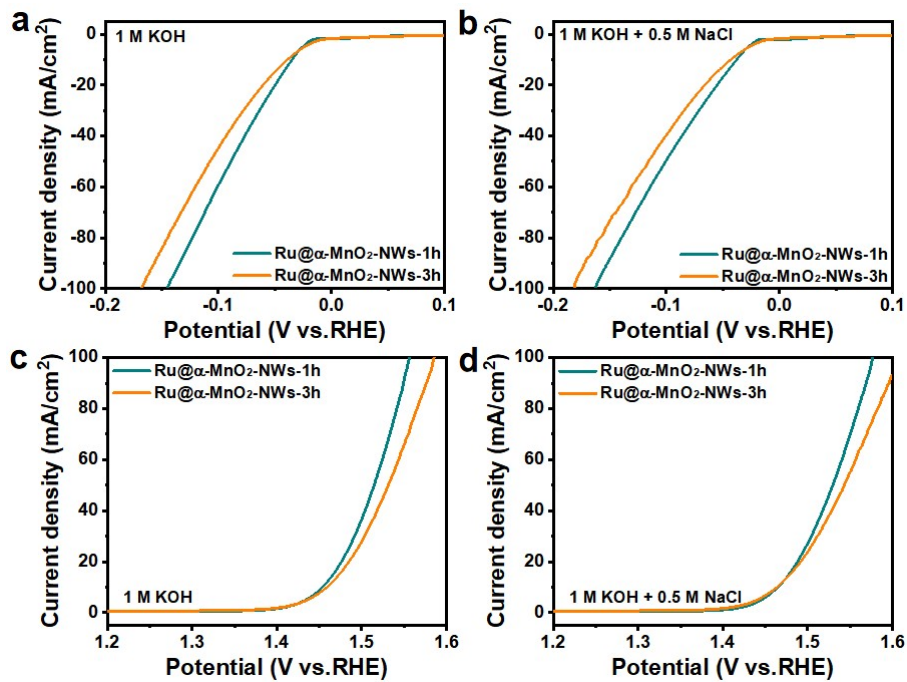

**Fig. S13** (a, b) HER and (c, d) OER polarization curves of Ru@α-MnO<sub>2</sub> NWs-1h and Ru@α-MnO<sub>2</sub> NWs-3h in (a, c) 1 M KOH and (b, d) 1 M KOH + 0.5 M NaCl.

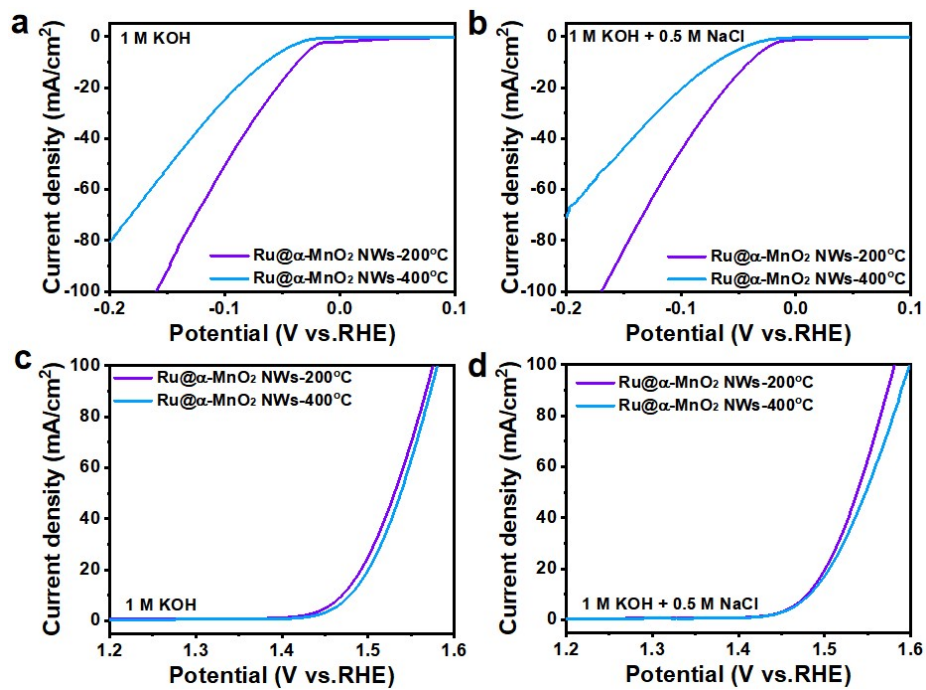

**Fig. S14** (a, b) HER and (c, d) OER polarization curves of Ru@α-MnO<sub>2</sub> NWs-200 °C and Ru@α-MnO<sub>2</sub> NWs-400 °C in (a, c) 1 M KOH and (b, d) 1 M KOH + 0.5 M NaCl.



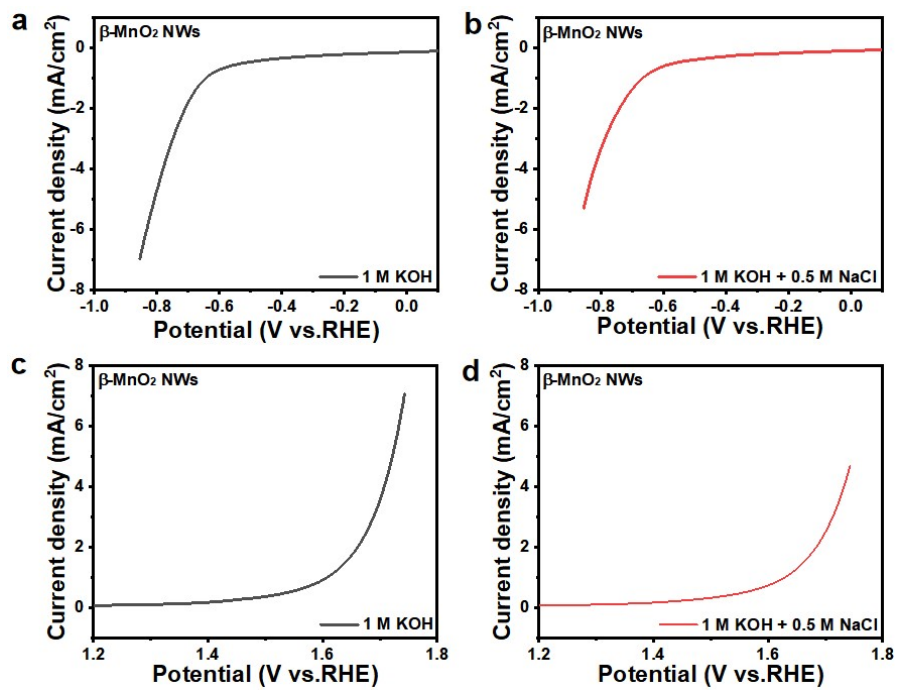

**Fig. S15** (a, b) HER and (c, d) OER polarization curves of  $\beta$ -MnO<sub>2</sub> NWs in (a, c) 1 M KOH and (b, d) 1 M KOH + 0.5 M NaCl.

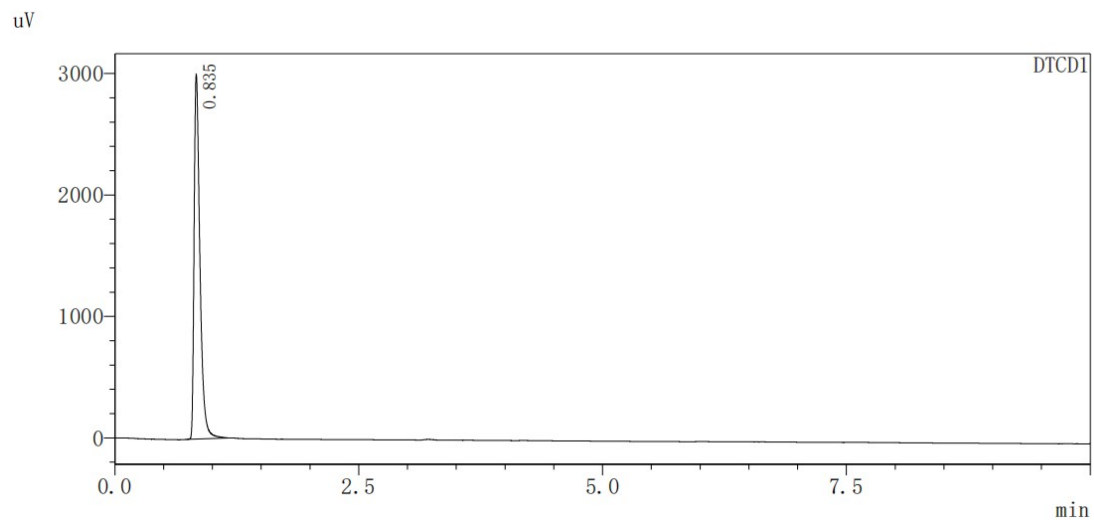

**Fig. S16** The Faraday Efficiency (FE) of H<sub>2</sub> for Ru@ $\alpha$ -MnO<sub>2</sub> NWs Catalyst.

The calculation method for the Faraday efficiency of the product is as follows:

$$FE_{\text{product}} = n_{\text{product}} \alpha F / Q \times 100\% \quad Q=It$$

Where  $n$  is the molar amount of the product,  $\alpha$  is the number of electrons transferred from one molecule of H<sub>2</sub>O to the product,  $F$  is 96485 C mol<sup>-1</sup> (Coulombs per mole), and  $Q$  is the total charge passed.

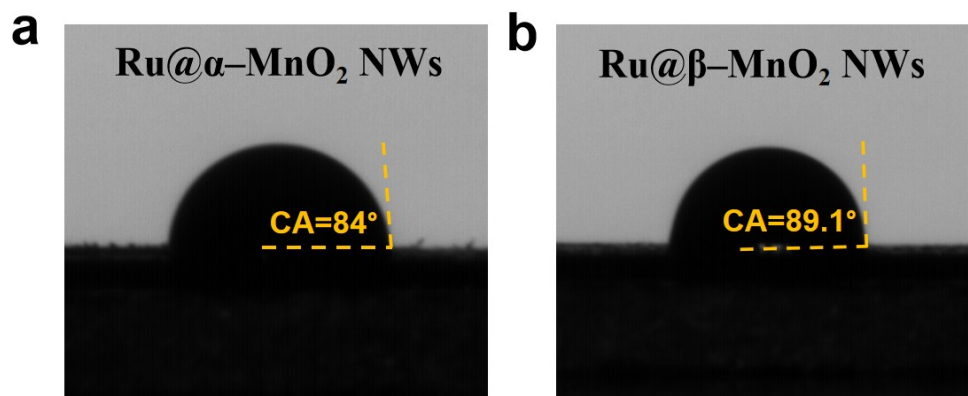

**Fig. S17** Contact angle of Ru@ $\alpha$ -MnO<sub>2</sub> NWs and Ru@ $\beta$ -MnO<sub>2</sub> NWs.

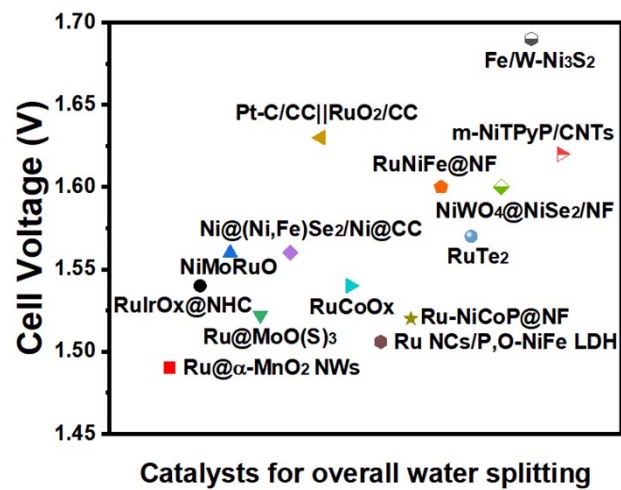

**Fig. S18** Comparison with other bifunctional catalysts.

**Table S1.** Ru@ $\alpha$ -MnO<sub>2</sub> NWs, compared with the overall hydrolysis performance of a reported catalyst

| Catalyst                                 | Current density        | HER (mV) | OER (mV) | Cell Voltage (V) | Reference                             |
|------------------------------------------|------------------------|----------|----------|------------------|---------------------------------------|
| Ru@ $\alpha$ -MnO <sub>2</sub> NWs       | 10 mA cm <sup>-2</sup> | 35       | 221      | 1.49             | This work                             |
| RuIrOx@NHC                               | 10 mA cm <sup>-2</sup> | 53       | 273      | 1.54             | Small. 2024, 20, 2308841.             |
| NiMoRuO                                  | 10 mA cm <sup>-2</sup> | 37       | 280      | 1.56             | Nano Lett. 2023, 23, 1052-1060.       |
| Ru@MoO(S) <sub>3</sub>                   | 10 mA cm <sup>-2</sup> | 30       | 265      | 1.522            | Nano Energy. 2022, 100, 107445.       |
| Ni@(Ni,Fe)Se <sub>2</sub> /Ni@CC         | 10 mA cm <sup>-2</sup> | 98       | 224      | 1.56             | ChemPhysMater. 2024, 3, 320-328.      |
| Pt-C/CC  RuO <sub>2</sub> /CC            | 10 mA cm <sup>-2</sup> | 40       | 270      | 1.63             | Appl. Catal. B. 2022, 317, 121729.    |
| RuCoOx                                   | 10 mA cm <sup>-2</sup> | 37       | 275      | 1.54             | Nano Lett. 2021, 21, 9633-9641.       |
| Ru NCs/P,O-NiFe LDH                      | 10 mA cm <sup>-2</sup> | 29       | 175      | 1.506            | Adv. Funct. Mater. 2024, 34, 2310690. |
| Ru-NiCoP@NF                              | 10 mA cm <sup>-2</sup> | 44       | 216      | 1.52             | Appl. Catal. B. 2020, 279, 119396.    |
| RuNiFe@NF                                | 10 mA cm <sup>-2</sup> | 62       | 210      | 1.60             | Chem. Eur. J. 2020, 26, 17091-17096.  |
| RuTe <sub>2</sub>                        | 10 mA cm <sup>-2</sup> | 34       | 275      | 1.57             | Appl. Catal. B. 2020, 278, 119281.    |
| NiWO <sub>4</sub> @NiSe <sub>2</sub> /NF | 10 mA cm <sup>-2</sup> | 132      | 258      | 1.60             | J. Alloys Compd. 2023, 951, 169941.   |
| Fe/W-Ni <sub>3</sub> S <sub>2</sub>      | 10 mA cm <sup>-2</sup> | 174      | 222      | 1.69             | Small, 2024, 20, 2311770.             |
| m-NiTPyP/CNTs                            | 10 mA cm <sup>-2</sup> | 138      | 267      | 1.62             | Adv. Mater. 2023, 35, 2210727.        |
